# Supplementary material for: Comparative Effectiveness of Intracranial Pressure Monitoring on 6-Month Outcomes of Critically Ill Patients With Traumatic Brain Injury
Source: PubMed Central journal article supplement (PMC10534270; doi:10.1001/jamanetworkopen.2023.34214), 2023-09-27
Supplement: jamanetwopen-e2334214-s002.pdf [file jamanetwopen-e2334214-s002.pdf]

\*First name, last name, and suffix (if applicable) are required and will appear in PubMed.

| <b>*Group Name(s): CReACTIVE consortium</b> |                   |                              |                  |                                                                                           |                                          |                                                         |                                                                                            |
|---------------------------------------------|-------------------|------------------------------|------------------|-------------------------------------------------------------------------------------------|------------------------------------------|---------------------------------------------------------|--------------------------------------------------------------------------------------------|
| <b>*First Name and Middle Initial(s)</b>    | <b>*Last Name</b> | <b>*Suffix (eg, Jr, III)</b> | Academic Degrees | Institution                                                                               | Location (city, state/province, country) | Role or Contribution, eg, chair, principal investigator | Group (if more than 1 Group listed in the byline and/or Subgroup (eg, Steering Committee)) |
| Fulvio                                      | Agostini          |                              |                  | A.O.U. Città della Salute e della Scienza di Torino, Servizio Anestesia e Rianimazione 3  | Torino, Italy                            |                                                         | CREACTIVE consortium                                                                       |
| Claudio                                     | Ajmone-Cat        |                              |                  | Azienda Ospedaliera San Camillo Forlanini, U.O.C. Shock e Trauma Centro di Rianimazione 1 | Roma, Italy                              |                                                         | CREACTIVE consortium                                                                       |
| Giovanni                                    | Bassi             |                              |                  | Ospedale Civico Carrara, Servizio di Anestesia e Rianimazione                             | Carrara, Italy                           |                                                         | CREACTIVE consortium                                                                       |
| Vasileios                                   | Bekos             |                              |                  | Athens Navy Hospital Intensive Care Unit                                                  | Athens, Greece                           |                                                         | CREACTIVE consortium                                                                       |
| Marzia                                      | Bellin            |                              |                  | Ospedale dell'Angelo, Terapia Intensiva Generale                                          | Mestre, Italy                            |                                                         | CREACTIVE consortium                                                                       |
| Maria Grazia                                | Bocci             |                              |                  | Policlinico Agostino Gemelli, Centro di Rianimazione                                      | Roma, Italy                              |                                                         | CREACTIVE consortium                                                                       |
| Valeria                                     | Bonato            |                              |                  | Civile - SS. Antonio e Biagio e C. Arrigo, Terapia Intensiva e Rianimazione               | Alessandria, Italy                       |                                                         | CREACTIVE consortium                                                                       |
| Alfeo                                       | Bonato            |                              |                  | Civil Hospital, Intensive Care Unit                                                       | Cittadella, Italy                        |                                                         | CREACTIVE consortium                                                                       |
| Manuela                                     | Bonizzoli         |                              |                  | Azienda Ospedaliero Universitaria Careggi, Terapia Intensiva di Emergenza                 | Firenze, Italy                           |                                                         | CREACTIVE consortium                                                                       |
| Paola                                       | Bonucci           |                              |                  | Azienda Ospedaliero - Universitaria Senese, Anestesia e Rianimazione DEA e dei Trapianti  | Siena, Italy                             |                                                         | CREACTIVE consortium                                                                       |
| Andrea                                      | Bottazzi          |                              |                  | Fondazione IRCCS Policlinico S.Matteo, Rianimazione Polivalente                           | Pavia, Italy                             |                                                         | CREACTIVE consortium                                                                       |

## Supplemental Online Content: Nonauthor Collaborators for the CReACTIVE Consortium

\*First name, last name, and suffix (if applicable) are required and will appear in PubMed.

| *First Name and Middle Initial(s) | *Last Name    | *Suffix (eg, Jr, III) | Academic Degrees | Institution                                                                                           | Location (city, state/province, country) | Role or Contribution, eg, chair, principal investigator | Group (if more than 1 Group listed in the byline) and/or Subgroup (eg, Steering Committee) |
|-----------------------------------|---------------|-----------------------|------------------|-------------------------------------------------------------------------------------------------------|------------------------------------------|---------------------------------------------------------|--------------------------------------------------------------------------------------------|
| Italo                             | Calamai       |                       |                  | Ospedale San Giuseppe                                                                                 | Empoli, Italy                            |                                                         | CREACTIVE consortium                                                                       |
| Giuseppe                          | Calicchio     |                       |                  | Azienda Ospedaliera Universitaria San Giovanni di Dio e Ruggi d'Aragona, Centro di Rianimazione       | Salerno, Italy                           |                                                         | CREACTIVE consortium                                                                       |
| Fabrizia                          | Carlin        |                       |                  | Ospedale San Martino, Terapia Intensiva                                                               | Belluno, Italy                           |                                                         | CREACTIVE consortium                                                                       |
| Sergio                            | Casagli       |                       |                  | Azienda Ospedaliera Universitaria Pisana, S.D. Neuroanestesia/Rianimazione                            | Pisa, Italy                              |                                                         | CREACTIVE consortium                                                                       |
| Carlo Alberto                     | Castioni      |                       |                  | Ospedale San Giovanni Bosco, Terapia Intensiva                                                        | Torino, Italy                            |                                                         | CREACTIVE consortium                                                                       |
| Rita                              | Ciceri        |                       |                  | Ospedale A. Manzoni, Rianimazione Generale                                                            | Lecco, Italy                             |                                                         | CREACTIVE consortium                                                                       |
| Francesco                         | Cocciolo      |                       |                  | Ospedale Maurizio Bufalini, Anestesia e Rianimazione                                                  | Cesena, Italy                            |                                                         | CREACTIVE consortium                                                                       |
| Ezio                              | Crestan       |                       |                  | Azienda Ospedaliera Ospedale di Lecco, Neuroranimazione II SAR                                        | Lecco, Italy                             |                                                         | CREACTIVE consortium                                                                       |
| Gabor                             | Csato         |                       |                  | Semmelweis University                                                                                 | Budapest, Hungary                        |                                                         | CREACTIVE consortium                                                                       |
| Peter                             | Cseplo        |                       |                  | Petz Aladár Megyei Oktató Kórház, Központi Aneszteziológiai és Intenzív Terápiás Osztály              | Győr, Hungary                            |                                                         | CREACTIVE consortium                                                                       |
| Francesco                         | Curto         |                       |                  | ASST Grande Ospedale Metropolitano Niguarda, Neuroranimazione                                         | Milano, Italy                            |                                                         | CREACTIVE consortium                                                                       |
| Wojciech                          | Dąbrowski     |                       |                  | University Hospital No 4, Anaesthesiology Intensive Therapy                                           | Lublin, Poland                           |                                                         | CREACTIVE consortium                                                                       |
| Anna                              | De Cristofaro |                       |                  | Azienda Ospedali Riuniti Marche Nord Presidio di Pesaro, Struttura Operativa Semplice di Rianimazione | Pesaro, Italy                            |                                                         | CREACTIVE consortium                                                                       |

## Supplemental Online Content: Nonauthor Collaborators for the CREATIVE Consortium

\*First name, last name, and suffix (if applicable) are required and will appear in PubMed.

| *First Name and Middle Initial(s) | *Last Name | *Suffix (eg, Jr, III) | Academic Degrees | Institution                                                                                                                                            | Location (city, state/province, country) | Role or Contribution, eg, chair, principal investigator | Group (if more than 1 Group listed in the byline and/or Subgroup (eg, Steering Committee)) |
|-----------------------------------|------------|-----------------------|------------------|--------------------------------------------------------------------------------------------------------------------------------------------------------|------------------------------------------|---------------------------------------------------------|--------------------------------------------------------------------------------------------|
| Alessandra                        | De Luca    |                       |                  | A.O. Universitaria Careggi, Area intensiva CTO                                                                                                         | Firenze, Italy                           |                                                         | CREACTIVE consortium                                                                       |
| Izabela                           | Duda       |                       |                  | Uniwersyteckie Centrum Kliniczne im. prof. K. Gibińskiego Śląskiego Uniwersytetu Medycznego w Katowicach, Oddział Anestezjologii i Intensywnej Terapii | Katowice, Poland                         |                                                         | CREACTIVE consortium                                                                       |
| Or                                | Duek       |                       |                  | Ben Gurion University of the Negev,                                                                                                                    | Beer Sheva, Israel                       |                                                         | CREACTIVE consortium                                                                       |
| Blanka Eموke                      | Bakó       |                       |                  | Bács-Kiskun Megyei Kórház, Központi Aneszteziológia és Intenzív Terápiás Osztály                                                                       | Kecskemét, Hungary                       |                                                         | CREACTIVE consortium                                                                       |
| Nazzareno                         | Fagoni     |                       |                  | Spedali Civili di Brescia, Neuroranimazione                                                                                                            | Brescia, Italy                           |                                                         | CREACTIVE consortium                                                                       |
| Paola                             | Fassini    |                       |                  | Azienda Ospedale Civile di Legnano, Rianimazione                                                                                                       | Legnano, Italy                           |                                                         | CREACTIVE consortium                                                                       |
| Enrico                            | Ferri      |                       |                  | Anesthesia Intensive Care and Prehospital Emergency, Maggiore Hospital                                                                                 | Bologna, Italy                           |                                                         | CREACTIVE consortium                                                                       |
| Suada                             | Filekovic  |                       |                  | University Medical Centre Ljubljana, Surgical ICU                                                                                                      | Lubiana, Slovenia                        |                                                         | CREACTIVE consortium                                                                       |
| Gilberto                          | Fiore      |                       |                  | Santa Croce - Moncalieri - ASL TO 5, Rianimazione e Terapia Intensiva                                                                                  | Moncalieri, Italy                        |                                                         | CREACTIVE consortium                                                                       |
| Emiliano                          | Gamberini  |                       |                  | Ospedale Maurizio Bufalini, Unità Operativa di Anestesia e Rianimazione                                                                                | Cesena, Italy                            |                                                         | CREACTIVE consortium                                                                       |
| Diego                             | Gattari    |                       |                  | Ospedale Civile, Rianimazione                                                                                                                          | Macerata, Italy                          |                                                         | CREACTIVE consortium                                                                       |
| Massimo                           | Gianni     |                       |                  | Ospedale Regionale Umberto Parini, Struttura Complessa di Rianimazione                                                                                 | Aosta, Italy                             |                                                         | CREACTIVE consortium                                                                       |

## Supplemental Online Content: Nonauthor Collaborators for the CREATiVE Consortium

\*First name, last name, and suffix (if applicable) are required and will appear in PubMed.

| *First Name and Middle Initial(s) | *Last Name | *Suffix (eg, Jr, III) | Academic Degrees | Institution                                                                                          | Location (city, state/province, country) | Role or Contribution, eg, chair, principal investigator | Group (if more than 1 Group listed in the byline) and/or Subgroup (eg, Steering Committee) |
|-----------------------------------|------------|-----------------------|------------------|------------------------------------------------------------------------------------------------------|------------------------------------------|---------------------------------------------------------|--------------------------------------------------------------------------------------------|
| Maria Giovanna                    | Dessena    |                       |                  | Ospedale Giovanni Paolo II, Rianimazione                                                             | Olbia, Italy                             |                                                         | CREACTIVE consortium                                                                       |
| Romano                            | Giuntini   |                       |                  | Ospedale San Giuseppe, Rianimazione                                                                  | Empoli, Italy                            |                                                         | CREACTIVE consortium                                                                       |
| Stefania                          | Guido      |                       |                  | AOU Maggiore della Carità, Anestesia e Rianimazione                                                  | Novara, Italy                            |                                                         | CREACTIVE consortium                                                                       |
| Rita                              | Gyulai     |                       |                  | Kenézy Kórház Gyula Kórház és Rendelőintézet, Központi Aneszteziológiai és Intenzív Terápiás Osztály | Debrecen, Hungary                        |                                                         | CREACTIVE consortium                                                                       |
| Amir                              | Hadash     |                       |                  | Rambam Medical Center, Pediatric Intensive Care Unit                                                 | Haifa, Israel                            |                                                         | CREACTIVE consortium                                                                       |
| Renata                            | Hribar     |                       |                  | Splošna Bolnišnica Novo Mesto, Enota Intenzivne Terapije                                             | Novo Mesto, Slovenia                     |                                                         | CREACTIVE consortium                                                                       |
| Stavroula                         | Ilija      |                       |                  | University General Hospital of Heraklion Pagni, Pediatric Intensive Care Unit                        | Heraklion, Greece                        |                                                         | CREACTIVE consortium                                                                       |
| Vesna Novak                       | Jankovic   |                       |                  | Clinical Department of Anaesthesiology and Intensive Therapy, University Medical Centre Ljubljana    | Ljubljana, Slovenia                      |                                                         | CREACTIVE consortium                                                                       |
| Vlado                             | Jurekovic  |                       |                  | General Hospital Jesenice                                                                            | Jesenice, Slovenia                       |                                                         | CREACTIVE consortium                                                                       |
| Mateja                            | Jereb      |                       |                  | Clinical Department of Anaesthesiology and Intensive Therapy, University Medical Centre Ljubljana    | Ljubljana, Slovenia                      |                                                         | CREACTIVE consortium                                                                       |
| Maciej                            | Kapias     |                       |                  | Szpital Śląski, Intensive Care Unit                                                                  | Cieszyn, Poland                          |                                                         | CREACTIVE consortium                                                                       |
| Dragica                           | Karadzic   |                       |                  | Clinical Department of Anaesthesiology and Intensive Therapy, University Medical Centre Ljubljana    | Ljubljana, Slovenia                      |                                                         | CREACTIVE consortium                                                                       |

## Supplemental Online Content: Nonauthor Collaborators for the CREATIVE Consortium

\*First name, last name, and suffix (if applicable) are required and will appear in PubMed.

| *First Name and Middle Initial(s) | *Last Name  | *Suffix (eg, Jr, III) | Academic Degrees | Institution                                                                                                                  | Location (city, state/province, country) | Role or Contribution, eg, chair, principal investigator | Group (if more than 1 Group listed in the byline) and/or Subgroup (eg, Steering Committee) |
|-----------------------------------|-------------|-----------------------|------------------|------------------------------------------------------------------------------------------------------------------------------|------------------------------------------|---------------------------------------------------------|--------------------------------------------------------------------------------------------|
| Darja                             | Kasnik      |                       |                  | General Hospital Slovenj Gradec, Department for Anaesthesiology and Intensive Care Medicine                                  | Slovenj Gradec, Slovenia                 |                                                         | CREACTIVE consortium                                                                       |
| Volakakis                         | Vaggelis    |                       |                  | Venizeleio - Pananeio General Hospital of Heraklion, Intensive Care Unit                                                     | Heraklion, Greece                        |                                                         | CREACTIVE consortium                                                                       |
| Adrienn Kitti                     | Szaszi      |                       |                  | Borsod-Abaúj-Zemplén Megyei Kórház és Egyetemi Oktató Kórház, Központi Aneszteziológiai és Intenzív Terápiás Osztály         | Miskolc, Hungary                         |                                                         | CREACTIVE consortium                                                                       |
| Janez                             | Kompan      |                       |                  | General Hospital Slovenj Gradec, Department for Anaesthesiology and Intensive Care Medicine                                  | Slovenj Gradec, Slovenia                 |                                                         | CREACTIVE consortium                                                                       |
| Eraclis                           | Kyriakides  |                       |                  | General Hospital                                                                                                             | Nicosia, Cyprus                          |                                                         | CREACTIVE consortium                                                                       |
| Silvia                            | Lagomarsino |                       |                  | Neurointensive Care Unit, Department of Anesthesia and Intensive Care Unit, AOU Careggi                                      | Firenze, Italy                           |                                                         | CREACTIVE consortium                                                                       |
| Sara                              | Lamborghini |                       |                  | Azienda Ospedaliero - Universitaria di Ferrara, Arcispedale S. Anna, Unità Operativa di Anestesia e Rianimazione Ospedaliera | Ferrara, Italy                           |                                                         | CREACTIVE consortium                                                                       |
| Sergio                            | Livigni     |                       |                  | Ospedale San Giovanni Bosco, Terapia Intensiva                                                                               | Torino, Italy                            |                                                         | CREACTIVE consortium                                                                       |
| Paolo                             | Malacarne   |                       |                  | AOUP, Rianimazione / PS                                                                                                      | Pisa, Italy                              |                                                         | CREACTIVE consortium                                                                       |
| Maria                             | Martelli    |                       |                  | AOUP, Rianimazione / PS                                                                                                      | Pisa, Italy                              |                                                         | CREACTIVE consortium                                                                       |
| Marina Alessandra                 | Martin      |                       |                  | San Bortolo, Centro di Rianimazione                                                                                          | Vicenza, Italy                           |                                                         | CREACTIVE consortium                                                                       |
| Costanza                          | Martino     |                       |                  | Ospedale Maurizio Bufalini                                                                                                   | Cesena, Italy                            |                                                         | CREACTIVE consortium                                                                       |
| Andrea                            | Marudi      |                       |                  | Nuovo Ospedale Civile Sant'Agostino Estense, Rianimazione Neurorianimazione                                                  | Modena, Italy                            |                                                         | CREACTIVE consortium                                                                       |

## Supplemental Online Content: Nonauthor Collaborators for the CReACTIVE Consortium

\*First name, last name, and suffix (if applicable) are required and will appear in PubMed.

| *First Name and Middle Initial(s) | *Last Name | *Suffix (eg, Jr, III) | Academic Degrees | Institution                                                                                                 | Location (city, state/province, country) | Role or Contribution, eg, chair, principal investigator | Group (if more than 1 Group listed in the byline) and/or Subgroup (eg, Steering Committee) |
|-----------------------------------|------------|-----------------------|------------------|-------------------------------------------------------------------------------------------------------------|------------------------------------------|---------------------------------------------------------|--------------------------------------------------------------------------------------------|
| Martina                           | Melis      |                       |                  | Ospedale Giovanni Paolo II, Rianimazione                                                                    | Olbia, Italy                             |                                                         | CREACTIVE consortium                                                                       |
| Francesca                         | Mengoli    |                       |                  | Department of Integration, Palliative Care Network, Maggiore Hospital                                       | Bologna, Italy                           |                                                         | CREACTIVE consortium                                                                       |
| Tomislav                          | Mirkovic   |                       |                  | Clinical Department of Anaesthesiology and Intensive Therapy, University Medical Centre Ljubljana           | Ljubljana, Slovenia                      |                                                         | CREACTIVE consortium                                                                       |
| Wiktoria                          | Mizak      |                       |                  | Oddział Anestezjologii i Intensywnej Terapii, Szpital Powiatowy Lipsko                                      | Lipsko, Poland                           |                                                         | CREACTIVE consortium                                                                       |
| Marina                            | Munari     |                       |                  | A.O. di Padova, Anestesia e Rianimazione NCH TI                                                             | Padova, Italy                            |                                                         | CREACTIVE consortium                                                                       |
| Gabor                             | Nardai     |                       |                  | Department of Anaesthesiology and Intensive Care, Péterfy Hospital and Trauma Centre                        | Budapest, Hungary                        |                                                         | CREACTIVE consortium                                                                       |
| Ennio                             | Nascimben  |                       |                  | Ospedale Ca' Foncello, Terapia Intensiva Neurochirurgica                                                    | Treviso, Italy                           |                                                         | CREACTIVE consortium                                                                       |
| Giuseppe                          | Natalini   |                       |                  | Fondazione Poliambulanza - Istituto Ospedaliero, Terapia Intensiva Polifunzionale                           | Brescia, Italy                           |                                                         | CREACTIVE consortium                                                                       |
| Giancarlo                         | Negro      |                       |                  | Francesco Ferrari, General Intensive Care Unit 1                                                            | Casarano, Italy                          |                                                         | CREACTIVE consortium                                                                       |
| Csaba                             | Nemes      |                       |                  | Fejér Megyei Szent György Egyetemi Oktató Kórház, Központi Aneszteziológiai és Intenzív Betegellátó Osztály | Székesfehérvár, Hungary                  |                                                         | CREACTIVE consortium                                                                       |
| Mara Olga                         | Bernasconi |                       |                  | S. Maria della Misericordia, Terapia Intensiva                                                              | Rovigo, Italy                            |                                                         | CREACTIVE consortium                                                                       |

## Supplemental Online Content: Nonauthor Collaborators for the CREATIVE Consortium

\*First name, last name, and suffix (if applicable) are required and will appear in PubMed.

| *First Name and Middle Initial(s) | *Last Name  | *Suffix (eg, Jr, III) | Academic Degrees | Institution                                                                           | Location (city, state/province, country) | Role or Contribution, eg, chair, principal investigator | Group (if more than 1 Group listed in the byline) and/or Subgroup (eg, Steering Committee) |
|-----------------------------------|-------------|-----------------------|------------------|---------------------------------------------------------------------------------------|------------------------------------------|---------------------------------------------------------|--------------------------------------------------------------------------------------------|
| Michele                           | Pagani      |                       |                  | Fondazione IRCCS Policlinico S.Matteo, Rianimazione Polivalente                       | Pavia, Italy                             |                                                         | CREACTIVE consortium                                                                       |
| Vieri                             | Parrini     |                       |                  | Ospedale del Mugello, Anestesia e Rianimazione                                        | Borgo San Lorenzo, Italy                 |                                                         | CREACTIVE consortium                                                                       |
| Panagio                           | Partala     |                       |                  | University Hospital Alexandroupolis, Intensive Care Unit                              | Alexandroupolis, Greece                  |                                                         | CREACTIVE consortium                                                                       |
| Mauro                             | Pastorelli  |                       |                  | Ospedale E. Agnelli, Rianimazione                                                     | Pinerolo, Italy                          |                                                         | CREACTIVE consortium                                                                       |
| Isabella                          | Pellicoli   |                       |                  | A.O. Papa Giovanni XXIII, Terapia Intensiva Pediatrica                                | Bergamo, Italy                           |                                                         | CREACTIVE consortium                                                                       |
| Paolo                             | Perino Bert |                       |                  | Ospedale di Ciriè, Rianimazione e Terapia Intensiva                                   | Torino, Italy                            |                                                         | CREACTIVE consortium                                                                       |
| Nicola                            | Petrucci    |                       |                  | Azienda Socio - Sanitaria Territoriale del Garda, Presidio di Desenzano, Rianimazione | Desenzano del Garda, Italy               |                                                         | CREACTIVE consortium                                                                       |
| Simone                            | Piva        |                       |                  | Spedali Civili di Brescia, Rianimazione Polifunzionale 2                              | Brescia, Italy                           |                                                         | CREACTIVE consortium                                                                       |
| Daniele                           | Poole       |                       |                  | Ospedale San Martino, Terapia Intensiva                                               | Belluno, Italy                           |                                                         | CREACTIVE consortium                                                                       |
| Laila                             | Portolani   |                       |                  | Anesthesia and Intensive Care Unit, AUSL Romagna, Maurizio Bufalini Hospital          | Cesena, Italy                            |                                                         | CREACTIVE consortium                                                                       |
| Danilo                            | Radrizzani  |                       |                  | Azienda Ospedale Civile di Legnano, Rianimazione                                      | Legnano, Italy                           |                                                         | CREACTIVE consortium                                                                       |
| Anna                              | Rekas       |                       |                  | Wojewódzki Szpital Specjalistyczny, Intensive Care Unit                               | Lublin, Poland                           |                                                         | CREACTIVE consortium                                                                       |
| Paweł                             | Robak       |                       |                  | Szpital Miejski im.J.Strusia w Poznaniu, Oddział Anestezjologii i Intensywnej Terapii | Poznan, Poland                           |                                                         | CREACTIVE consortium                                                                       |

## Supplemental Online Content: Nonauthor Collaborators for the CReACTIVE Consortium

\*First name, last name, and suffix (if applicable) are required and will appear in PubMed.

| *First Name and Middle Initial(s) | *Last Name | *Suffix (eg, Jr, III) | Academic Degrees | Institution                                                                                                          | Location (city, state/province, country) | Role or Contribution, eg, chair, principal investigator | Group (if more than 1 Group listed in the byline) and/or Subgroup (eg, Steering Committee) |
|-----------------------------------|------------|-----------------------|------------------|----------------------------------------------------------------------------------------------------------------------|------------------------------------------|---------------------------------------------------------|--------------------------------------------------------------------------------------------|
| Antonio                           | Rosano     |                       |                  | Fondazione Poliambulanza - Istituto Ospedaliero, Terapia Intensiva Polifunzionale                                    | Brescia, Italy                           |                                                         | CREACTIVE consortium                                                                       |
| Patrizia                          | Ruggeri    |                       |                  | Istituti Ospitalieri di Cremona, Terapia Intensiva                                                                   | Cremona, Italy                           |                                                         | CREACTIVE consortium                                                                       |
| Marco                             | Sacchi     |                       |                  | ASST Grande Ospedale Metropolitano Niguarda, Neuroranimazione                                                        | Milano, Italy                            |                                                         | CREACTIVE consortium                                                                       |
| Ágnes                             | Sárkány    |                       |                  | Fejér Megyei Szent György Egyetemi Oktató Kórház, Központi Aneszteziológiai és Intenzív Betegellátó Osztály          | Székesfehérvár, Hungary                  |                                                         | CREACTIVE consortium                                                                       |
| Mara                              | Skoti      |                       |                  | Splosna Bolnisnica Izola, Enota Intenzivne Terapije                                                                  | Izola, Slovenia                          |                                                         | CREACTIVE consortium                                                                       |
| Alja                              | Skrt       |                       |                  | Splosna Bolnisnica Izola, Enota Intenzivne Terapije                                                                  | Izola, Slovenia                          |                                                         | CREACTIVE consortium                                                                       |
| Ermanno                           | Spagarino  |                       |                  | Nuovo Ospedale degli Infermi, Struttura Semplice di Rianimazione e Terapia Intensiva                                 | Ponderano, Italy                         |                                                         | CREACTIVE consortium                                                                       |
| Wiktor                            | Sulkowski  |                       |                  | Szpital Powiatowy w Ostrowi Mazowieckiej, Anaesthesiology and Intensive Care Department                              | Ostrów Mazowiecka, Poland                |                                                         | CREACTIVE consortium                                                                       |
| Balázs                            | Szedlák    |                       |                  | Borsod-Abaúj-Zemplén Megyei Kórház és Egyetemi Oktató Kórház, Központi Aneszteziológiai és Intenzív Terápiás Osztály | Miskolc, Hungary                         |                                                         | CREACTIVE consortium                                                                       |
| Marina                            | Terzitta   |                       |                  | G.B. Morgagni - L. Pierantoni, Rianimazione                                                                          | Forlì, Italy                             |                                                         | CREACTIVE consortium                                                                       |
| Rebecca                           | Tinturini  |                       |                  | AOU Senese, Anestesia e Terapia Intensiva Neurochirurgia                                                             | Siena, Italy                             |                                                         | CREACTIVE consortium                                                                       |



## Supplemental Online Content: Nonauthor Collaborators for the CREATIVE Consortium

\*First name, last name, and suffix (if applicable) are required and will appear in PubMed.

| *First Name and Middle Initial(s) | *Last Name   | *Suffix (eg, Jr, III) | Academic Degrees | Institution                                                                                                                  | Location (city, state/province, country) | Role or Contribution, eg, chair, principal investigator | Group (if more than 1 Group listed in the byline) and/or Subgroup (eg, Steering Committee) |
|-----------------------------------|--------------|-----------------------|------------------|------------------------------------------------------------------------------------------------------------------------------|------------------------------------------|---------------------------------------------------------|--------------------------------------------------------------------------------------------|
| Rossella                          | Tofani       |                       |                  | Spedali Riuniti Livorno, Unità Operativa Anestesia e Rianimazione                                                            | Livorno, Italy                           |                                                         | CREACTIVE consortium                                                                       |
| Paraskevi                         | Tselioti     |                       |                  | Tzaneio General Hospital, General Intensive Care Unit                                                                        | Pireus, Greece                           |                                                         | CREACTIVE consortium                                                                       |
| Ada                               | Vecchiarelli |                       |                  | Santa Maria della Misericordia, Unità di Terapia Intensiva                                                                   | Perugia, Italy                           |                                                         | CREACTIVE consortium                                                                       |
| Elisabetta                        | Venturini    |                       |                  | Civile - SS. Antonio e Biagio e C. Arrigo, Terapia Intensiva e Rianimazione                                                  | Alessandria, Italy                       |                                                         | CREACTIVE consortium                                                                       |
| Salvatore                         | Visconti     |                       |                  | Ospedale S. Maria di Loreto, Centro di Rianimazione "Marco Pica"                                                             | Napoli, Italy                            |                                                         | CREACTIVE consortium                                                                       |
| Valeria                           | Zompanti     |                       |                  | Ospedale Civile, Rianimazione                                                                                                | Macerata, Italy                          |                                                         | CREACTIVE consortium                                                                       |
| Roberto                           | Zoppellari   |                       |                  | Azienda Ospedaliero - Universitaria di Ferrara, Arcispedale S. Anna, Unità Operativa di Anestesia e Rianimazione Ospedaliera | Ferrara, Italy                           |                                                         | CREACTIVE consortium                                                                       |
