# Supplementary material for: Comparative Effectiveness of Intracranial Pressure Monitoring on 6-Month Outcomes of Critically Ill Patients With Traumatic Brain Injury
Source: PubMed Central journal article supplement (PMC10534270; doi:10.1001/jamanetworkopen.2023.34214), 2023-09-27
Supplement: jamanetwopen-e2334214-s003.pdf [file jamanetwopen-e2334214-s003.pdf]

## Data Sharing Statement

Nattino. Comparative Effectiveness of Intracranial Pressure Monitoring on 6-Month Outcomes of Critically Ill Patients With Traumatic Brain Injury. *JAMA Netw Open*. Published September 22, 2023. doi:10.1001/jamanetworkopen.2023.34214

### Data

**Data available:** No
